# Supplementary material
Source: MDPI journal article supplement (https://www.mdpi.com/1999-4907/13/9/1402)
Supplement: s1 [file s1]

Supplementary Materials

**Table S1.** Effects of litter species, tissue and their interaction on the initial litter chemistries tested by two-way ANOVA.

|                    | <i>df</i> | C %    | N %    | P %    | C:N    | N:P    | Lignin<br>% | Remaining<br>mass % |
|--------------------|-----------|--------|--------|--------|--------|--------|-------------|---------------------|
| Species            | 3         | <0.001 | <0.001 | <0.001 | <0.001 | <0.001 | <0.001      | <0.001              |
| Tissue             | 1         | <0.001 | <0.001 | <0.001 | <0.001 | <0.001 | <0.001      | 0.048               |
| Species<br>×Tissue | 3         | <0.001 | <0.001 | <0.001 | <0.001 | <0.001 | <0.001      | <0.001              |

The numbers in the table represent the *p*-values.

**Table S2.** Effects of litter species, tissue and their interaction on the bacterial alpha diversity indices tested by two-way ANOVA.

|                    | <i>df.</i> | Observed<br>species | Coverage<br>% | Chao1  | Ace    | Phylogenetic<br>diversity (PD) | Shannon |
|--------------------|------------|---------------------|---------------|--------|--------|--------------------------------|---------|
| Species            | 3          | 0.018               | 0.005         | 0.057  | 0.003  | <0.001                         | 0.074   |
| Tissue             | 1          | <0.001              | <0.001        | <0.001 | <0.001 | <0.001                         | 0.109   |
| Species<br>×Tissue | 3          | <0.001              | <0.001        | <0.001 | <0.001 | <0.001                         | 0.220   |

The numbers in the table represent the *p*-values.

**Table S3.** Effects of litter species, tissue and their interaction on the top ten dominant bacterial phyla tested by two-way ANOVA.

|                         | Species         |                 | Tissue          |                 | Species ×Tissue |                 |
|-------------------------|-----------------|-----------------|-----------------|-----------------|-----------------|-----------------|
|                         | <i>F</i> -value | <i>p</i> -value | <i>F</i> -value | <i>p</i> -value | <i>F</i> -value | <i>p</i> -value |
| <i>Proteobacteria</i>   | 1.073           | 0.388           | 0.860           | 0.368           | 0.858           | 0.483           |
| <i>Actinobacteria</i>   | 0.553           | 0.653           | 0.000           | 0.997           | 1.272           | 0.318           |
| <i>Bacteroidetes</i>    | 4.074*          | 0.025           | 16.407**        | 0.001           | 1.059           | 0.394           |
| <i>Acidobacteria</i>    | 3.353*          | 0.045           | 10.647**        | 0.005           | 0.212           | 0.887           |
| <i>Planctomycetes</i>   | 1.430           | 0.271           | 0.124           | 0.729           | 1.506           | 0.251           |
| <i>Gemmatimonadetes</i> | 3.327*          | 0.046           | 14.278**        | 0.002           | 6.698**         | 0.004           |
| <i>Cyanobacteria</i>    | 1.067           | 0.391           | 0.107           | 0.748           | 0.691           | 0.571           |
| <i>Verrucomicrobia</i>  | 0.561           | 0.649           | 0.733           | 0.405           | 1.032           | 0.405           |
| <i>Firmicutes</i>       | 2.980           | 0.063           | 16.045**        | 0.001           | 2.036           | 0.149           |
| <i>Chloroflexi</i>      | 0.501           | 0.687           | 4.482*          | 0.050           | 2.165           | 0.132           |

**Table S4.** Effects of litter species, tissue and their interaction on the top ten dominant bacterial genera tested by two-way ANOVA.

|                                      | Species         |                 | Tissue          |                 | Species ×Tissue |                 |
|--------------------------------------|-----------------|-----------------|-----------------|-----------------|-----------------|-----------------|
|                                      | <i>F</i> -value | <i>p</i> -value | <i>F</i> -value | <i>p</i> -value | <i>F</i> -value | <i>p</i> -value |
| <i>Burkholderia-Paraburkholderia</i> | 7.585**         | 0.002           | 8.564**         | 0.010           | 1.491           | 0.255           |
| <i>Bradyrhizobium</i>                | 3.618*          | 0.036           | 3.848           | 0.067           | 0.891           | 0.467           |
| <i>Massilia</i>                      | 0.747           | 0.540           | 2.687           | 0.121           | 0.691           | 0.571           |
| <i>Sphingomonas</i>                  | 0.681           | 0.577           | 9.058**         | 0.008           | 1.322           | 0.302           |
| <i>Caulobacter</i>                   | 1.140           | 0.363           | 0.044           | 0.837           | 0.695           | 0.569           |
| <i>Rhizomicrobium</i>                | 7.034**         | 0.003           | 0.246           | 0.627           | 1.143           | 0.362           |
| <i>Rhizobium</i>                     | 1.059           | 0.394           | 2.087           | 0.168           | 1.020           | 0.410           |
| <i>Pseudoxanthomonas</i>             | 0.902           | 0.462           | 1.442           | 0.247           | 0.829           | 0.497           |
| <i>Chitinophaga</i>                  | 3.017           | 0.061           | 0.063           | 0.805           | 1.311           | 0.305           |
| <i>Mucilaginibacter</i>              | 3.322*          | 0.047           | 13.139**        | 0.002           | 0.697           | 0.567           |
